# Supplementary material for: Monofloral Corn Poppy Bee-Collected Pollen—A Detailed Insight into Its Phytochemical Composition and Antioxidant Properties
Source: MDPI journal article supplement (doi:10.3390/antiox12071424), 2023-07-14
Supplement: s1 [file s1]

**Table S1.** Equation parameters and correlation coefficient (R<sup>2</sup>) used for phenolic standards.

| Standards     | Y=a*X±b                            | R <sup>2</sup> |
|---------------|------------------------------------|----------------|
| Gentisic acid | Y= 1726721*X+466061.0629           | 0.9924         |
| Coumaric acid | Y= 404285.2881*X+13101.3113        | 0.9981         |
| Caffeic acid  | Y= 3049527.6728*X+856403.3939      | 0.9921         |
| Ferulic acid  | Y= 172046.6074*X-47682.2769        | 0.9906         |
| Chrysin       | Y= 421642.8753*X+255584.8437       | 0.9914         |
| Pinocembrin   | Y= 156751.2871*X+40416.1819        | 0.997          |
| Quercetin     | Y= 769214.5670 * x + 825343.6827   | 0.9915         |
| Isorhamnetin  | Y= 1084944.2566 * x + 1008067.9239 | 0.9936         |
